# Supplementary material
Source: publisher site journal article supplement (https://www.dovepress.com/article/332776)
Supplement: Supplementary file 1 [file get_supplementary_file.php]

# Supplementary Material

Supplementary table 1 - Cancer type grouping, inclusion status, and exclusion criteria.

| ICD10                        | Cancer type                  | Specific group | Reason                                                                       |
|------------------------------|------------------------------|----------------|------------------------------------------------------------------------------|
| C00-C14, C30-C33             | Head and neck                | No             | Relatively rare and not primarily treated with systemic anticancer treatment |
| C15-C16                      | Gastro-oesophageal           | Yes            |                                                                              |
| C17                          | Intestine                    | No             | Rare                                                                         |
| C18-C20                      | Colo-rectal                  | Yes            |                                                                              |
| C21                          | Anal                         | No             | Rare                                                                         |
| C22-C24                      | Hepato-biliary               | No             | Referred to other hospitals                                                  |
| C25                          | Pancreatic                   | Yes            |                                                                              |
| C26, C39, C55, C57, C76, C80 | Ill-defined                  | No             | Ill-defined                                                                  |
| C34                          | Lung                         | Yes            |                                                                              |
| C37-C38                      | Thoracic other than lung     | No             | Rare                                                                         |
| C40-C41                      | Bone and articular cartilage | No             | Rare                                                                         |
| C43                          | Melanoma                     | No             | Referred to other hospitals                                                  |
| C44                          | Skin other than melanoma     | No             | Not treated with systemic anticancer treatment                               |
| C45-C49                      | Connective and soft tissue   | No             | Rare                                                                         |
| C50                          | Breast                       | Yes            |                                                                              |
| C51-C52                      | Vulva and vagina             | No             | Rare                                                                         |
| C53                          | Cervical                     | No             | Referred to other hospitals                                                  |
| C54                          | Endometrial                  | Yes            |                                                                              |
| C56                          | Ovarian                      | Yes            |                                                                              |
| C58                          | Placenta                     | No             | Rare                                                                         |
| C61                          | Prostate                     | Yes            |                                                                              |
| C64-C68                      | Urinary                      | Yes            |                                                                              |
| C69-C70                      | Eye and meninges             | No             | Rare                                                                         |
| C71                          | Brain                        | Yes            |                                                                              |
| C72                          | Nervous system               | No             | Rare                                                                         |
| C73-C75                      | Endocrine                    | No             | Rare                                                                         |
| C77-C79                      | Secondary                    | No             | Not primary                                                                  |

*“Specific group” refers to the fact that the corresponding diagnosis groups were considered individually, while other diagnoses were grouped into an “Other” group.*

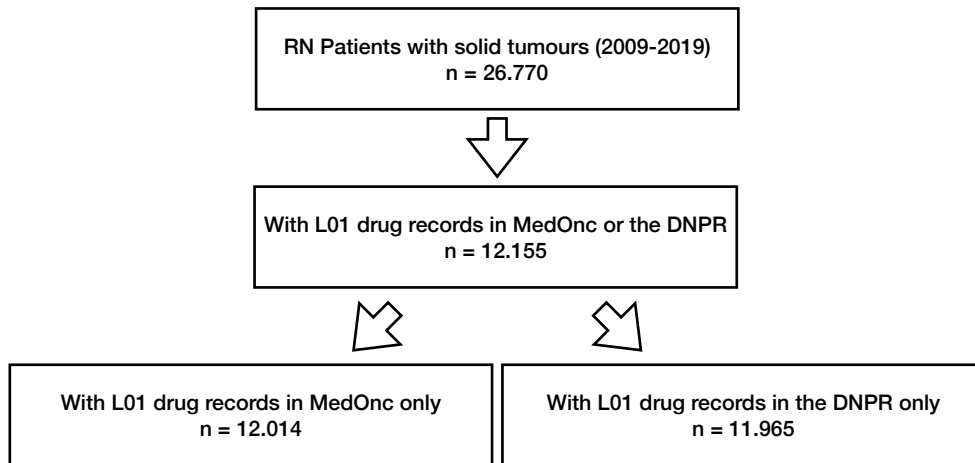

Supplementary figure 1 – Inclusion flow chart. RN stands for North Denmark Region. L01 drugs refer to drugs whose codes, according to the ATC classification, start with L01, namely antineoplastic agents.
